# Supplementary material for: Exploring multidimensional operationalizations of precarious employment in Swedish register data – a typological approach and a summative score approach
Source: PubMed Central journal article supplement (PMC8114571; doi:10.5271/sjweh.3928), 2021-03-01
Supplement: SJWEH-47-117-S001.pdf [file SJWEH-47-117-S001.pdf]

# Exploring multi-dimensional operationalizations of precarious employment in Swedish register data – a typological approach and a summative score approach <sup>1</sup>

by Johanna Jonsson, MSc,<sup>2</sup> Nuria Matilla-Santander, PhD, Bertina Kreshpaj, MSc, Cecilia Orellana, PhD, Gun Johansson, PhD, Bo Burström, PhD, Magnus Alderling, MSc, Trevor Peckham, PhD, Katarina Kjellberg, PhD, Jenny Selander, PhD, Per-Olof Östergren, PhD, Theo Bodin, PhD

1. Supplementary material
2. Correspondence to: Johanna Jonsson, Unit of *Occupational* Medicine, Institute of Environmental Medicine, Karolinska Institutet, Solnavägen 4, 11365 Stockholm, Sweden. [E-mail: johanna.jonsson@ki.se]

**Figure S1. Flow chart of study population**

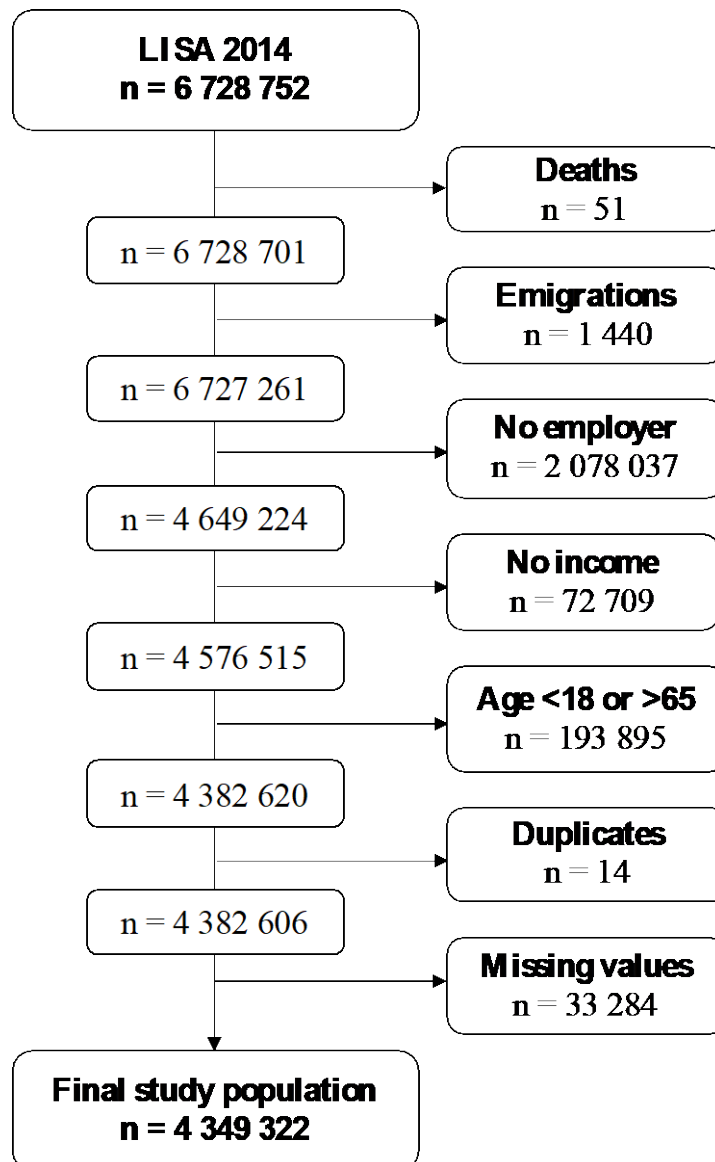

| Table S1. Probability of being covered by occupational pension in 2014, stratified by gender                      |      |        |
|-------------------------------------------------------------------------------------------------------------------|------|--------|
|                                                                                                                   | Male | Female |
| Public sector company                                                                                             |      |        |
| Working in a public sector company                                                                                | 100* | 100*   |
| Working in a private sector company – employers branch of economic activity                                       |      |        |
| Agriculture, forestry, fishing                                                                                    | 81.2 | 79.0   |
| Mining and quarrying; Manufacturing                                                                               | 97.9 | 97.7   |
| Electricity, gas and air conditioning supply; Water supply; sewerage, waste management and remediation activities | 97.8 | 98.5   |
| Construction                                                                                                      | 93.9 | 91.2   |
| Wholesale and retail trade, repair of motor vehicles and motorcycles                                              | 94.0 | 94.7   |
| Transportation and storage                                                                                        | 93.4 | 96.2   |
| Accommodation and food service activities                                                                         | 76.8 | 86.8   |
| Information, communication                                                                                        | 93.9 | 94.8   |
| Financial and insurance activities                                                                                | 96.6 | 97.7   |
| Real estate activities                                                                                            | 88.7 | 89.9   |
| Professional, scientific and technical activities; Administrative and support service activities                  | 93.4 | 93.5   |
| Public administration and defence; compulsory social security                                                     | 100* | 100*   |
| Education                                                                                                         | 87.1 | 93.5   |
| Human health and social work activities                                                                           | 95.8 | 97.4   |
| Arts, entertainment and recreation; Other service activities                                                      | 83.9 | 82.4   |
| Working in a private sector company - number of employees in the company                                          |      |        |
| 1                                                                                                                 | 0*   | 0*     |
| 2-5                                                                                                               | 72.1 | 70.4   |
| 6-10                                                                                                              | 88.2 | 87.0   |
| 11-50                                                                                                             | 96.2 | 95.8   |
| 51-100                                                                                                            | 98.6 | 98.1   |
| ≥101                                                                                                              | 98.5 | 98.7   |
| *Imputed values for the sake of the operationlisation                                                             |      |        |

Table S2. Model fit measures from exploratory and confirmatory latent class analyses

| Exploratory (half sample)                  |              |             |               |         |
|--------------------------------------------|--------------|-------------|---------------|---------|
| Cluster solution                           | AIC          | BIC         | BIC, adjusted | Entropy |
| Four clusters                              | 17140689.58  | 17141382.16 | 17141207.36   | 0.85    |
| Five clusters                              | 17092929.43  | 17093798.30 | 17093579.02   | 0.87    |
| Six clusters                               | 17066101.59  | 17067146.76 | 17066882.98   | 0.81    |
| Seven clusters                             | 17050299.87  | 17051451.33 | 17051143.06   | 0.76    |
| Confirmatory, final solution (full sample) |              |             |               |         |
|                                            | AIC          | BIC         | BIC, adjusted | Entropy |
| Six clusters                               | 34129266.853 | 34130369.55 | 34130105.77   | 0.81    |

| Table S3. Conditional item probabilities for the final employment typology. SER=Standard Employment Relationship; BO=Business Owners; PER=Precarious Employment Relationship; P-SE=Precarious Self-Employment; P-MJH=Precarious Multiple Job Holders. |     |    |            |     |      |       |
|-------------------------------------------------------------------------------------------------------------------------------------------------------------------------------------------------------------------------------------------------------|-----|----|------------|-----|------|-------|
|                                                                                                                                                                                                                                                       | SER | BO | Proficians | PER | P-SE | P-MJH |
| Total                                                                                                                                                                                                                                                 | 60  | 2  | 10         | 22  | 5    | 2     |
| Contractual relationship insecurity                                                                                                                                                                                                                   |     |    |            |     |      |       |
| Directly employed by the employer                                                                                                                                                                                                                     | 93  | 0  | 78         | 91  | 20   | 11    |
| Employed by an agency                                                                                                                                                                                                                                 | 1   | 0  | 1          | 4   | 0    | 0     |
| Combination of self-employment and direct employment                                                                                                                                                                                                  | 7   | 4  | 21         | 5   | 4    | 84    |
| Self-employed                                                                                                                                                                                                                                         | 0   | 96 | 0          | 0   | 17   | 3     |
| Solo self-employed                                                                                                                                                                                                                                    | 0   | 0  | 0          | 0   | 59   | 2     |
| Contractual temporariness                                                                                                                                                                                                                             |     |    |            |     |      |       |
| Stable employment                                                                                                                                                                                                                                     | 92  | 92 | 51         | 8   | 77   | 46    |
| Unstable employment                                                                                                                                                                                                                                   | 8   | 8  | 49         | 92  | 24   | 54    |
| Multiple jobs/economic sectors                                                                                                                                                                                                                        |     |    |            |     |      |       |
| 1 job                                                                                                                                                                                                                                                 | 94  | 94 | 11         | 45  | 96   | 4     |
| ≥2 jobs                                                                                                                                                                                                                                               | 0   | 4  | 40         | 19  | 3    | 31    |
| ≥2 jobs in >1 economic sector                                                                                                                                                                                                                         | 6   | 2  | 49         | 36  | 1    | 65    |
| Income level                                                                                                                                                                                                                                          |     |    |            |     |      |       |
| ≥200% of the median                                                                                                                                                                                                                                   | 6   | 8  | 11         | 1   | 1    | 4     |
| 120-199% of the median                                                                                                                                                                                                                                | 29  | 52 | 44         | 6   | 16   | 24    |
| 80-119% of the median                                                                                                                                                                                                                                 | 49  | 31 | 40         | 26  | 26   | 28    |
| 60-79% of the median                                                                                                                                                                                                                                  | 11  | 6  | 5          | 20  | 18   | 15    |
| <60% of the median                                                                                                                                                                                                                                    | 5   | 4  | 0          | 47  | 39   | 29    |
| CBA coverage                                                                                                                                                                                                                                          |     |    |            |     |      |       |
| >90%                                                                                                                                                                                                                                                  | 87  | 20 | 83         | 64  | 0    | 15    |
| 70-90%                                                                                                                                                                                                                                                | 11  | 41 | 14         | 24  | 0    | 15    |
| ≤70%                                                                                                                                                                                                                                                  | 2   | 39 | 3          | 12  | 100  | 70    |

| Table S4. Rationale for labels of the emerging employment typology |                                                                                                                                                                                                                                                                                                                                             |
|--------------------------------------------------------------------|---------------------------------------------------------------------------------------------------------------------------------------------------------------------------------------------------------------------------------------------------------------------------------------------------------------------------------------------|
| Employment type                                                    | Rationale for label                                                                                                                                                                                                                                                                                                                         |
| Standard Employment Relationship                                   | Resembles the SER described in literature, characterized by socially protected, stable, and full-time employment <sup>1</sup> .                                                                                                                                                                                                             |
| Business Owners                                                    | Reflects self-employed that, in addition to having had the ability to employ employees and as such have better protection against economic downturns, have better conditions compared to solo self-employed.                                                                                                                                |
| Proficians                                                         | "Proficians", as described by Standing <sup>2</sup> , refers to a group of highly skilled and flexible professionals. Previous studies have labelled similar employment types as "portfolio" jobs <sup>3,4</sup> .                                                                                                                          |
| Precarious Employment Relationship                                 | Embodies the expected features of traditional PE-conditions, including employment instability and poor income <sup>5,6</sup> .                                                                                                                                                                                                              |
| Precarious Self-employment                                         | Reflects the precarious and vulnerable situation of solo self-employed on the labor market, having more income- and job-insecurity compared to employed <sup>7</sup> and being more sensitive to economic pressures and downturns than self-employed with employees due to the lack of protection from a larger organization <sup>8</sup> . |
| Precarious Multiple Job holders                                    | As multiple job holding has been argued to be a feature of PE <sup>5,6,9</sup> , taken together with poor CBA coverage and poor-moderate income, this employment type was labelled to reflect precarious multiple job holders.                                                                                                              |

1 Bosch G. Towards a new standard employment relationship in Western Europe. *British journal of industrial relations*. 2004;42 (4):617-36.

2 Standing G. *The precariat: The new dangerous class*: Bloomsbury Publishing; 2011.

3 Van Aerden K, Moors G, Levecque K, Vanroelen C. Measuring Employment Arrangements in the European Labour Force: A Typological Approach. *Social Indicators Research*. 2014;116 (3):771-91. doi: 10.1007/s11205-013-0312-0. PubMed PMID: WOS:000334177600007.

4 Peckham T, Fujishiro K, Hajat A, Flaherty BP, Seixas N. Evaluating Employment Quality as a Determinant of Health in a Changing Labor Market. *RSF: The Russell Sage Foundation Journal of the Social Sciences*. 2019;5 (4):258-81. doi: 10.7758/rsf.2019.5.4.09.

5 Bodin T, Çağlayan Ç, Garde AH, Gnesi M, Jonsson J, Kiran S, et al. Precarious employment in occupational health - an OMEGA-NET working group position paper. *Scandinavian journal of work, environment & health*. 2020;46 (3):321-9. doi: 10.5271/sjweh.3860.

6 Kreshpaj B, Orellana C, Burström B, Davis L, Hemmingsson T, Johansson G, et al. What is precarious employment? A systematic review of definitions and operationalizations from quantitative and qualitative studies. *Scandinavian journal of work, environment & health*. 2020;46 (3):235-47. doi: 10.5271/sjweh.3875.

7 Rasmussen S, Nätti J, Larsen TP, Ilsøe A, Garde AH. Nonstandard Employment in the Nordics—Toward Precarious Work? *Nordic Journal of Working Life Studies*. 2019;9(S6). doi: <https://doi.org/10.18291/njwls.v9iS6.114689>.

8 Noack AM, Vosko LF. *Precarious jobs in Ontario: Mapping dimensions of labor market insecurity by workers' social location and context*. Toronto: Law Commission of Ontario; 2011.

9 Koranyi I, Jonsson J, Rönnblad T, Stockfelt L, Bodin T. Authors' response to "Multiple-job holding is not a type of precarious employment". *Scandinavian journal of work, environment & health*. 2018;45 (1):100.
